# Supplementary material
Source: publisher site journal article supplement (https://www.dovepress.com/article/602613)
Supplement: Supplementary file 1 [file 602613%20Supplementary%20Material.pdf]

## Supplementary Tables

Supplementary Table S1. Disease Classifications and Categories

| Category                      | Disease Name                                                |
|-------------------------------|-------------------------------------------------------------|
| 1. Neurologic diseases        | Stroke                                                      |
|                               | Parkinson's disease                                         |
|                               | Dementia (e.g., Alzheimer's disease)                        |
|                               | Vegetative state                                            |
|                               | Hypertension                                                |
| 2. Cardiovascular diseases    | Heart disease (e.g., Coronary heart disease, Heart failure) |
|                               | Hyperlipidemia                                              |
| 3. Chronic geriatric diseases | Diabetes mellitus                                           |
|                               | Hyperuricemia                                               |
|                               | Chronic renal insufficiency                                 |
|                               | Benign prostatic hyperplasia (BPH)                          |
| 4. Other diseases             | Chronic obstructive pulmonary disease (COPD)                |
|                               | Chronic Bronchitis                                          |
|                               | Oncological diseases                                        |
|                               | Psychiatric and psychological diseases                      |
|                               | Liver Diseases                                              |
|                               | Fractures, Bone                                             |

Supplementary Table S2. Multivariable logistic regression analysis of factors independently associated with overall satisfaction.

| Variable             | B     | Std. Err. | Wald   | df | p-value     | Exp(B)(OR)  | 95%CI for Exp(B) |       |
|----------------------|-------|-----------|--------|----|-------------|-------------|------------------|-------|
|                      |       |           |        |    |             |             | Lower            | Upper |
| Smoking status       | -.900 | .698      | 1.664  | 1  | .197        | .407        | .104             | 1.596 |
| Drinking status      | -.819 | .771      | 1.127  | 1  | .289        | .441        | .097             | 2.000 |
| Combined dysfunction | -.472 | .245      | 3.703  | 1  | .054        | .624        | .386             | 1.009 |
| <b>Gender</b>        | -.753 | .325      | 5.377  | 1  | <b>.020</b> | <b>.471</b> | .249             | .890  |
| Age                  | .461  | .305      | 2.287  | 1  | .130        | 1.586       | .872             | 2.885 |
| Longshi Scale score  | .087  | .376      | .053   | 1  | .817        | 1.091       | .522             | 2.278 |
| Constant             | 4.246 | 1.012     | 17.586 | 1  | .000        | 69.809      |                  |       |

Notes: B, regression coefficient; Std. Err., standard error; Wald, Wald chi-square statistic; df, degrees of freedom; OR, odds ratio; CI, confidence interval.

Reference categories: Female (for Gender), Non-smoker (for Smoke), etc.

Variables with statistically significant associations ( $p < 0.05$ ) are shown in bold.

## Supplementary Questionnaires

Figure S1. Questionnaire (English version)

### Questionnaire on the Satisfaction of the Disabled Elderly Patients

#### Research Objectives:

To investigate the satisfaction status of disabled elderly inpatients across various disease categories.

#### Research Content:

After obtaining written informed consent from participants, data on the satisfaction status of elderly individuals in nursing facilities will be collected through direct interviews. The collected information includes: General information (demographic characteristics, lifestyle habits), Disease Information (diseases diagnosis, comorbidities, complications, dysfunction diagnoses, self-care ability), and patients' satisfaction survey.

#### Investigation Form

| General Information |                                                                                                                                                                                                                                                                                                                                                                                                                                                                                                                                                                                                                                                                                                                                                                                                                                                                                                                                                                                                                                                                               |                     |                                                                       |                          |                                                                  |
|---------------------|-------------------------------------------------------------------------------------------------------------------------------------------------------------------------------------------------------------------------------------------------------------------------------------------------------------------------------------------------------------------------------------------------------------------------------------------------------------------------------------------------------------------------------------------------------------------------------------------------------------------------------------------------------------------------------------------------------------------------------------------------------------------------------------------------------------------------------------------------------------------------------------------------------------------------------------------------------------------------------------------------------------------------------------------------------------------------------|---------------------|-----------------------------------------------------------------------|--------------------------|------------------------------------------------------------------|
| Name                |                                                                                                                                                                                                                                                                                                                                                                                                                                                                                                                                                                                                                                                                                                                                                                                                                                                                                                                                                                                                                                                                               | Gender              | <input type="checkbox"/> 1=Male,<br><input type="checkbox"/> 2=Female | Age (years)              | <input type="checkbox"/> 1≥65 ,<br><input type="checkbox"/> 2≥81 |
| Phone               |                                                                                                                                                                                                                                                                                                                                                                                                                                                                                                                                                                                                                                                                                                                                                                                                                                                                                                                                                                                                                                                                               | Date of Onset       |                                                                       | Date of Hospitalization  |                                                                  |
| Height (cm)         |                                                                                                                                                                                                                                                                                                                                                                                                                                                                                                                                                                                                                                                                                                                                                                                                                                                                                                                                                                                                                                                                               | Weight (kg)         |                                                                       | BMI (Kg/m <sup>2</sup> ) |                                                                  |
| Smoking             |                                                                                                                                                                                                                                                                                                                                                                                                                                                                                                                                                                                                                                                                                                                                                                                                                                                                                                                                                                                                                                                                               | Alcohol Consumption |                                                                       |                          |                                                                  |
| Disease Information |                                                                                                                                                                                                                                                                                                                                                                                                                                                                                                                                                                                                                                                                                                                                                                                                                                                                                                                                                                                                                                                                               |                     |                                                                       |                          |                                                                  |
| Primary Diagnosis   | <input type="checkbox"/> 1 Cerebral Infarction, <input type="checkbox"/> 2 Cerebral Hemorrhage, <input type="checkbox"/> 3 Traumatic Brain Injury, <input type="checkbox"/> 4 Brain Tumor, <input type="checkbox"/> 5 Spinal Cord Injury, <input type="checkbox"/> 6 Fracture, <input type="checkbox"/> 7 Alzheimer's Disease, Other: _____                                                                                                                                                                                                                                                                                                                                                                                                                                                                                                                                                                                                                                                                                                                                   |                     |                                                                       |                          |                                                                  |
| Comorbidities       | <input type="checkbox"/> 1 Hypertension — Duration: __, Medication: __;<br><input type="checkbox"/> 2 Heart Disease (Coronary Heart Disease/Heart Failure/Atrial Fibrillation) — Duration: __, Medication: __;<br><input type="checkbox"/> 3 Diabetes — Duration: __, Medication: __;<br><input type="checkbox"/> 4 Hyperlipidemia — Duration: __, Medication: __;<br><input type="checkbox"/> 5 Hyperuricemia — Duration: __, Medication: __;<br><input type="checkbox"/> 6 Chronic Obstructive Pulmonary Disease (COPD) — Duration: __, Medication: __;<br><input type="checkbox"/> 7 Chronic Renal Insufficiency — Duration: __, Medication: __;<br><input type="checkbox"/> 8 Abnormal Liver Function — Duration: __, Medication: __;<br><input type="checkbox"/> 9 Fracture — Duration: __, Medication: __;<br><input type="checkbox"/> 10 Parkinson's Disease — Duration: __, Medication: __;<br><input type="checkbox"/> 11 Dementia — Duration: __, Medication: __;<br><input type="checkbox"/> 12 Anxiety/Depression — Duration: __, Medication: __;<br>Other: _____ |                     |                                                                       |                          |                                                                  |

|                      |                                                                                                                                                                                                                                                                                                                                                                                                                                            |
|----------------------|--------------------------------------------------------------------------------------------------------------------------------------------------------------------------------------------------------------------------------------------------------------------------------------------------------------------------------------------------------------------------------------------------------------------------------------------|
| Complications        | Record complications at admission and current complications:<br><input type="checkbox"/> Deep Vein Thrombosis, <input type="checkbox"/> Urinary Tract Infection, <input type="checkbox"/> Pulmonary Infection, <input type="checkbox"/> Osteoporosis, <input type="checkbox"/> Pressure Ulcer, <input type="checkbox"/> Other: _____                                                                                                       |
| Functional Diagnosis | <input type="checkbox"/> Motor Dysfunction, <input type="checkbox"/> Sensory Dysfunction, <input type="checkbox"/> Bladder/Bowel Dysfunction, <input type="checkbox"/> Speech Disorder, <input type="checkbox"/> Swallowing Disorder, <input type="checkbox"/> Cognitive Impairment, <input type="checkbox"/> Cardiopulmonary Dysfunction, <input type="checkbox"/> Psychological/Mental Disorder, <input type="checkbox"/> Sleep Disorder |
| Self-care Ability    | Longshi Scale (LS) Score: _____ (at admission); _____ (current)                                                                                                                                                                                                                                                                                                                                                                            |

| Patient Satisfaction Survey                                                                                                           |                                                                                                                                                                                                             |
|---------------------------------------------------------------------------------------------------------------------------------------|-------------------------------------------------------------------------------------------------------------------------------------------------------------------------------------------------------------|
| <b>Health Improvement</b><br>How satisfied are you with the improvement of your health status after staying in the nursing home?      | <input type="checkbox"/> A. Very satisfied <input type="checkbox"/> B. Satisfied <input type="checkbox"/> C. Neutral <input type="checkbox"/> D. Dissatisfied <input type="checkbox"/> E. Very dissatisfied |
| <b>staff attitude</b><br>How satisfied are you with the service attitude of the nursing staff?                                        | <input type="checkbox"/> A. Very satisfied <input type="checkbox"/> B. Satisfied <input type="checkbox"/> C. Neutral <input type="checkbox"/> D. Dissatisfied <input type="checkbox"/> E. Very dissatisfied |
| <b>Service quality</b><br>How satisfied are you with the professional service quality of the nursing staff?                           | <input type="checkbox"/> A. Very satisfied <input type="checkbox"/> B. Satisfied <input type="checkbox"/> C. Neutral <input type="checkbox"/> D. Dissatisfied <input type="checkbox"/> E. Very dissatisfied |
| <b>Needs fulfillment</b><br>To what extent are you satisfied with the degree to which the nursing services meet your personal needs?  | <input type="checkbox"/> A. Very satisfied <input type="checkbox"/> B. Satisfied <input type="checkbox"/> C. Neutral <input type="checkbox"/> D. Dissatisfied <input type="checkbox"/> E. Very dissatisfied |
| <b>Service pricing</b><br>How satisfied are you with the pricing of the nursing services provided by the institution?                 | <input type="checkbox"/> A. Very satisfied <input type="checkbox"/> B. Satisfied <input type="checkbox"/> C. Neutral <input type="checkbox"/> D. Dissatisfied <input type="checkbox"/> E. Very dissatisfied |
| <b>living environment</b><br>How satisfied are you with the living environment of the nursing home?                                   | <input type="checkbox"/> A. Very satisfied <input type="checkbox"/> B. Satisfied <input type="checkbox"/> C. Neutral <input type="checkbox"/> D. Dissatisfied <input type="checkbox"/> E. Very dissatisfied |
| <b>Humanistic care</b><br>How satisfied are you with the humanistic care (emotional support and respect) provided by the institution? | <input type="checkbox"/> A. Very satisfied <input type="checkbox"/> B. Satisfied <input type="checkbox"/> C. Neutral <input type="checkbox"/> D. Dissatisfied <input type="checkbox"/> E. Very dissatisfied |
| <b>Overall Satisfaction</b><br>What is your overall level of satisfaction with the nursing home?                                      | <input type="checkbox"/> A. Very satisfied <input type="checkbox"/> B. Satisfied <input type="checkbox"/> C. Neutral <input type="checkbox"/> D. Dissatisfied <input type="checkbox"/> E. Very dissatisfied |

Figure S2. Original Chinese version of the questionnaire (for reference).

## 关于失能老年住院患者满意度的问卷调查

### 研究目的：

了解失能老年住院患者在不同疾病类别中的满意度状况。

### 研究内容：

在获得参与者的书面知情同意后。通过直接访谈的方式收集护理机构老年人的满意度数据。初始资料包括：一般状况（人口学信息、生活习惯）、疾病情况（疾病诊断、合并症、并发症、功能诊断、自理能力）和患者满意度调查。

### 调查信息表

| 一般状况情况  |                                                                                                                                                                                                                                                                                                                                                                                                                                                 |         |                                                            |                         |                                                              |
|---------|-------------------------------------------------------------------------------------------------------------------------------------------------------------------------------------------------------------------------------------------------------------------------------------------------------------------------------------------------------------------------------------------------------------------------------------------------|---------|------------------------------------------------------------|-------------------------|--------------------------------------------------------------|
| 姓名      |                                                                                                                                                                                                                                                                                                                                                                                                                                                 | 性别      | <input type="checkbox"/> 1=男, <input type="checkbox"/> 2=女 | 年龄 (岁)                  | <input type="checkbox"/> 1≥65, <input type="checkbox"/> 2≥81 |
| 电话      |                                                                                                                                                                                                                                                                                                                                                                                                                                                 | 发病时间    | ____年____月____日                                            | 住院时间                    | ____年____月____日                                              |
| 身高 (cm) |                                                                                                                                                                                                                                                                                                                                                                                                                                                 | 体重 (Kg) |                                                            | BMI(Kg/m <sup>2</sup> ) |                                                              |
| 吸烟      |                                                                                                                                                                                                                                                                                                                                                                                                                                                 | 饮酒      |                                                            |                         |                                                              |
| 疾病情况    |                                                                                                                                                                                                                                                                                                                                                                                                                                                 |         |                                                            |                         |                                                              |
| 疾病诊断    | <input type="checkbox"/> 1 脑梗死, <input type="checkbox"/> 2 脑出血, <input type="checkbox"/> 3 脑外伤, <input type="checkbox"/> 4 脑肿瘤, <input type="checkbox"/> 4 脊髓损伤 <input type="checkbox"/> 5 骨折 <input type="checkbox"/> 6 阿尔茨海默病, <input type="checkbox"/> 其他____                                                                                                                                                                                |         |                                                            |                         |                                                              |
| 合并症     | <input type="checkbox"/> 1 高血压, 时间__, 是否服用药物__;<br><input type="checkbox"/> 2 心脏病 (冠心病/心衰/房颤), 时间__, 是否服用药物__;<br><input type="checkbox"/> 5 糖尿病, 时间__, 是否服用药物__;<br><input type="checkbox"/> 6 高脂血症, 时间__, 是否服用药物__;<br><input type="checkbox"/> 7 高尿酸血症, 时间__, 是否服用药物__;<br><input type="checkbox"/> 8 慢性阻塞性肺疾病, 时间__, 是否服用药物__;<br><input type="checkbox"/> 9 慢性肾功能不全, 时间__, 是否服用药物__;<br><input type="checkbox"/> 10 肝功能异常, 时间__, 是否服用药物__; |         |                                                            |                         |                                                              |

|      |                                                                                                                                                                                                                                                                                            |
|------|--------------------------------------------------------------------------------------------------------------------------------------------------------------------------------------------------------------------------------------------------------------------------------------------|
|      | <input type="checkbox"/> 11 骨折, 时间__, 是否服用药物__;<br><input type="checkbox"/> 12 帕金森, 时间__, 是否服用药物__;<br><input type="checkbox"/> 13 阿尔茨海默病, 时间__, 是否服用药物__;<br><input type="checkbox"/> 14 焦虑抑郁, 时间__, 是否服用药物__;<br>其他_____                                                                 |
| 并发症  | 记录入院时和目前并发症情况:<br><input type="checkbox"/> 深静脉血栓形成, <input type="checkbox"/> 尿路感染, <input type="checkbox"/> 肺部感染, <input type="checkbox"/> 骨质疏松, <input type="checkbox"/> 褥疮, <input type="checkbox"/> 其他                                                                                  |
| 功能诊断 | <input type="checkbox"/> 运动障碍, <input type="checkbox"/> 感觉障碍, <input type="checkbox"/> 二便障碍, <input type="checkbox"/> 言语障碍, <input type="checkbox"/> 吞咽障碍, <input type="checkbox"/> 认知障碍,<br><input type="checkbox"/> 心肺障碍, <input type="checkbox"/> 精神心理障碍, <input type="checkbox"/> 睡眠障碍 |
| 自理能力 | 龙氏量表: _____ (入院), _____ (目前);                                                                                                                                                                                                                                                              |

| 患者满意度调查                  |                                                                                                                                                                 |
|--------------------------|-----------------------------------------------------------------------------------------------------------------------------------------------------------------|
| 入住护理院后, 您对自己健康状况改善效果的满意度 | <input type="checkbox"/> A 非常满意, <input type="checkbox"/> B 满意, <input type="checkbox"/> C 一般, <input type="checkbox"/> D 不满意, <input type="checkbox"/> E 非常不满意 |
| 您对护理人员的服务态度的满意度          | <input type="checkbox"/> A 非常满意, <input type="checkbox"/> B 满意, <input type="checkbox"/> C 一般, <input type="checkbox"/> D 不满意, <input type="checkbox"/> E 非常不满意 |
| 您对护理人员的服务水平的满意度          | <input type="checkbox"/> A 非常满意, <input type="checkbox"/> B 满意, <input type="checkbox"/> C 一般, <input type="checkbox"/> D 不满意, <input type="checkbox"/> E 非常不满意 |
| 您对护理院提供的护理服务满足您需求程度的满意度  | <input type="checkbox"/> A 非常满意, <input type="checkbox"/> B 满意, <input type="checkbox"/> C 一般, <input type="checkbox"/> D 不满意, <input type="checkbox"/> E 非常不满意 |
| 您对护理院的护理服务价格的满意度         | <input type="checkbox"/> A 非常满意, <input type="checkbox"/> B 满意, <input type="checkbox"/> C 一般, <input type="checkbox"/> D 不满意, <input type="checkbox"/> E 非常不满意 |
| 您对护理院的居住环境的满意度           | <input type="checkbox"/> A 非常满意, <input type="checkbox"/> B 满意, <input type="checkbox"/> C 一般, <input type="checkbox"/> D 不满意, <input type="checkbox"/> E 非常不满意 |
| 您对护理院的人文关怀的满意度           | <input type="checkbox"/> A 非常满意, <input type="checkbox"/> B 满意, <input type="checkbox"/> C 一般, <input type="checkbox"/> D 不满意, <input type="checkbox"/> E 非常不满意 |
| 您对护理院的整体满意度              | <input type="checkbox"/> A 非常满意, <input type="checkbox"/> B 满意, <input type="checkbox"/> C 一般, <input type="checkbox"/> D 不满意, <input type="checkbox"/> E 非常不满意 |
